# Supplementary material for: A deep-blue crystalline organic light-emitting diode based on a solid-solution thin-film emitting layer
Source: Royal Society of Chemistry journal article supplement (doi:10.1039/d3tc00320e), 2023-01-01
Supplement: d3tc00320e1.pdf [file d3tc00320e1.pdf]

Supplementary Information

**A deep-blue crystalline organic light-emitting diode based on solid-solution thin-film emitting layer**

Peifu Sun<sup>1,2</sup>, Feng Zhu<sup>1,2\*</sup>, Donghang Yan<sup>1,2</sup>

<sup>1</sup>State Key Laboratory of Polymer Physics and Chemistry, Changchun Institute of Applied Chemistry, Chinese Academy of Sciences; Changchun 130022, China.

<sup>2</sup>School of Applied Chemistry and Engineering, University of Science and Technology of China; Hefei 230026, China.

\*Corresponding author. Email: [zhufeng@ciac.ac.cn](mailto:zhufeng@ciac.ac.cn)

**Contents:**

1. Fabrication and AFM image of crystalline OSS layer
2. 2Theta of out-of-plane XRD patterns
3. ADPL measurement
4. TDMV of  $\rho$ -DPPI molecule
5. Photophysical characterization
6. Optimized OSS C-OLED device
7. Comparisons between 2FPPIcZ:  $\rho$ -DPPI and 2FPPIcZ: BPPI OSS C-OLEDs.

## 1. Fabrication and AFM image of crystalline OSS layer

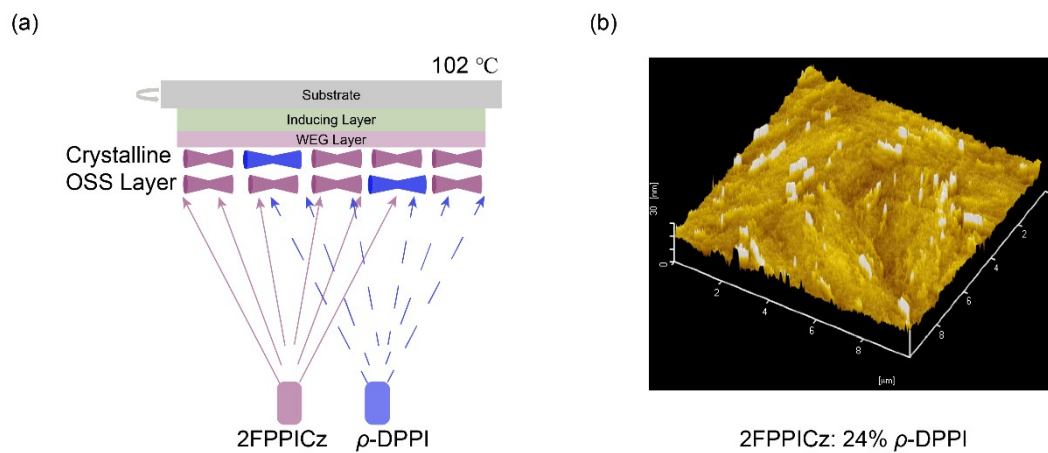

**Fig. S1** (a) Fabrication of crystalline OSS layer. (b) AFM image of 2FPPICz: 24%  $\rho$ -DPPI crystalline thin films.

## 2. 2Theta of out-of-plane XRD patterns

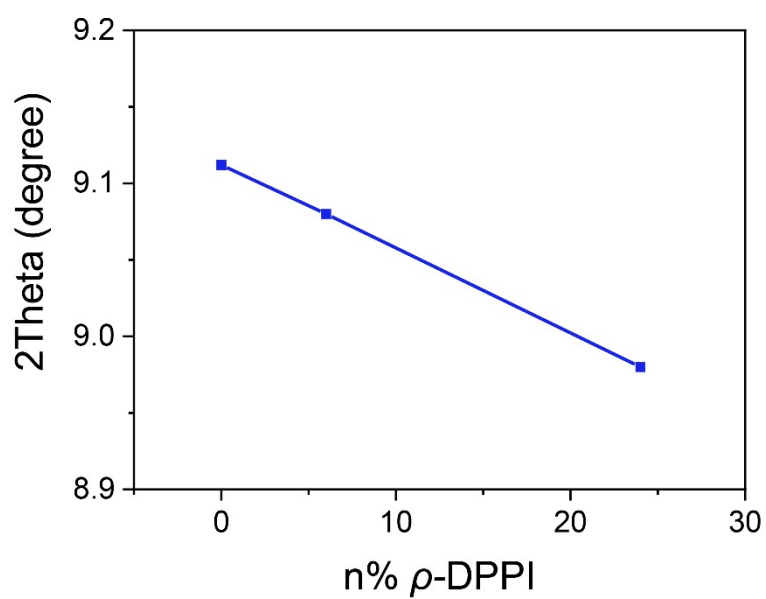

**Fig. S2** 2Theta of out-of-plane X-ray diffraction patterns corresponding to different concentrations of crystalline OSS thin films.

### 3. ADPL measurement

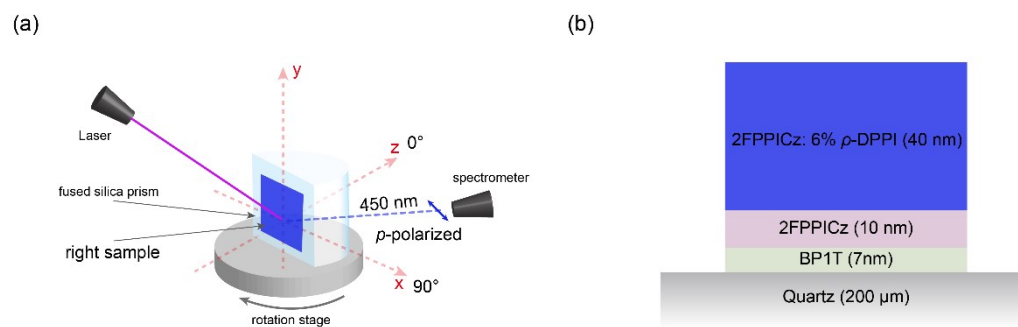

**Fig. S3** Schematic illustration of ADPL (a) and corresponding sample structure (b).

#### 4. TDMV of $\rho$ -DPPI molecule

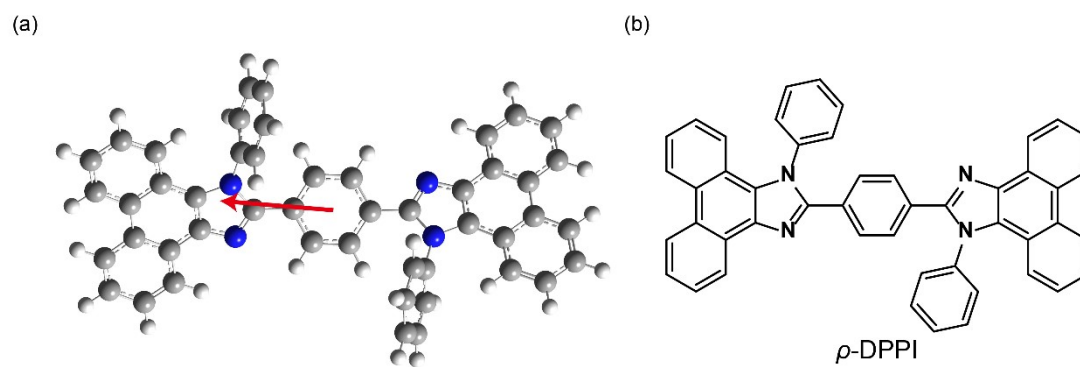

**Fig. S4** TDMV of  $\rho$ -DPPI molecule (a) and molecular structure of  $\rho$ -DPPI (b).

## 5. Photophysical characterization

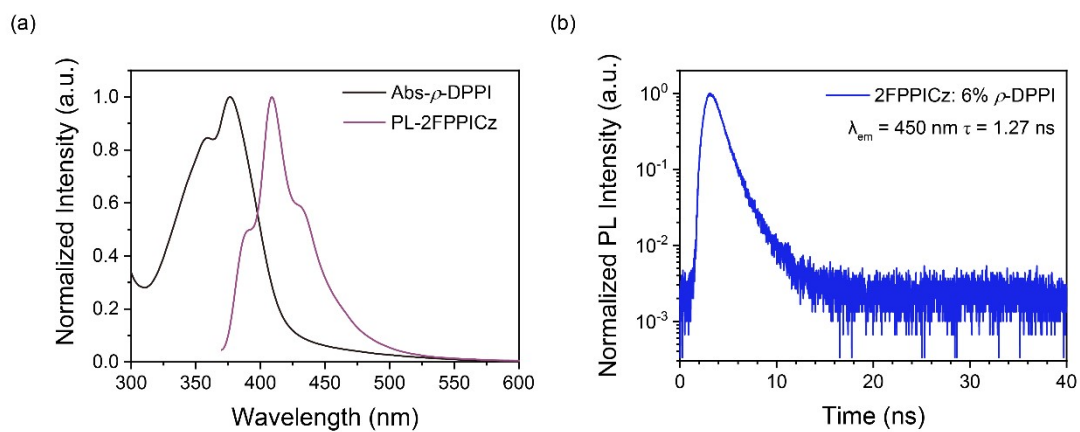

**Fig. S5** (a) PL spectrum of 2FPPICz crystalline thin film and absorption spectrum of  $\rho$ -DPPI crystalline thin film. (b) Transient PL decay curve of 2FPPICz: 6%  $\rho$ -DPPI crystalline OSS thin film.

## 6. Optimized OSS C-OLED device

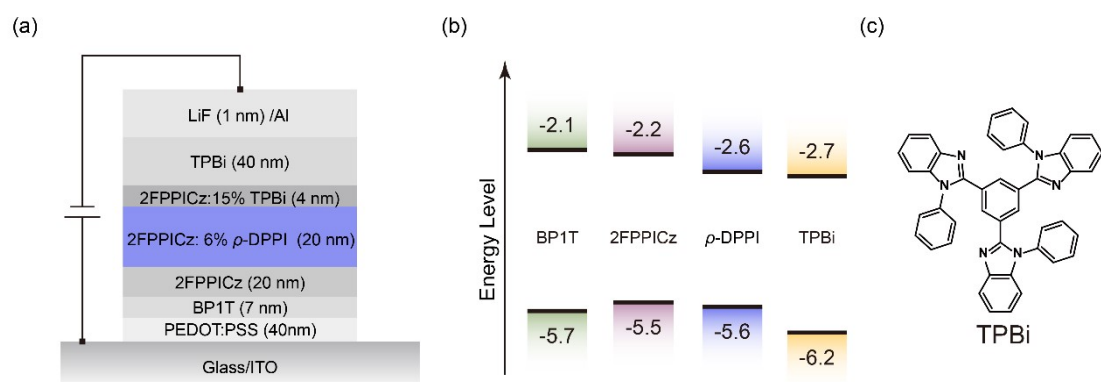

**Fig. S6** (a) Architecture of optimized OSS C-OLED. (b) Energy level of BP1T, 2FPPICz,  $\rho$ -DPPI and TPBi. (c) Molecular structure of TPBi.

**Table S1 Comparisons between 2FPPIcZ:  $\rho$ -DPPI and 2FPPIcZ: BPPI OSS C-OLEDs.**

| Comparisons                             | 2FPPIcZ: $\rho$ -DPPI<br>( <i>this work</i> )                                     | 2FPPIcZ: BPPI*<br>( <i>Ref. 24</i> )                                               |
|-----------------------------------------|-----------------------------------------------------------------------------------|------------------------------------------------------------------------------------|
| Guest molecules                         | $\rho$ -DPPI                                                                      | BPPI                                                                               |
| Guest molecular structure               | 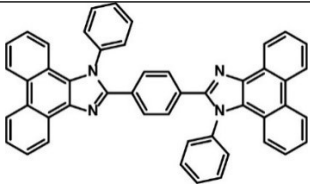 |  |
| Solid-solution solubility               | 24%                                                                               | 10%                                                                                |
| Characteristic peak of Out-of-plane XRD | Vary with guest concentrations.                                                   | Do not vary with guest concentrations.                                             |
| Substitutional form                     | One guest molecule substitutes one host molecule.                                 | One guest molecule substitutes more than one host molecules.                       |
| Anisotropy factor $\Theta$              | 90%                                                                               | 92.5%                                                                              |
| PLQY                                    | 72%                                                                               | 86%                                                                                |
| CIE                                     | (0.15, 0.07)                                                                      | (0.15, 0.07)                                                                       |
| Maximum EQE                             | 5.3%                                                                              | 6.5%                                                                               |
| Maximum CE, PE                          | 4.4 cd A <sup>-1</sup> , 4.4 lm W <sup>-1</sup>                                   | 5.8 cd A <sup>-1</sup> , 5.9 lm W <sup>-1</sup>                                    |
| Driving voltage                         | 4.6 V @ 1000 cd m <sup>-2</sup>                                                   | 4.0 V @ 1000 cd m <sup>-2</sup>                                                    |
| Series-resistance joule-heat loss ratio | 12.6% @ 1000 cd m <sup>-2</sup>                                                   | 11.1% @ 1000 cd m <sup>-2</sup>                                                    |

\*Data of 2FPPIcZ: BPPI C-OLED are extracted from the article of *Nat. Photon.* 17, 264–272 (2023).
